# Supplementary material for: Discontinuation of oral anticoagulation therapy after successful atrial fibrillation ablation: A systematic review and meta-analysis of prospective studies
Source: PLOS journal article supplement (doi:10.1371/journal.pone.0253709), 2021-06-24
Supplement: S4 (10.1371/journal.pone.0253709.s004) [file journal.pone.0253709.s004]

S2 Table. The Newcastle-Ottawa Scale of individual study

| Study                  | Selection                                           |                                           |                              | Outcome of interest<br>was not present at<br>start of study | Comparability                                                                 | Assessment<br>of outcome | Outcome                           |                               | Overall<br>score |
|------------------------|-----------------------------------------------------|-------------------------------------------|------------------------------|-------------------------------------------------------------|-------------------------------------------------------------------------------|--------------------------|-----------------------------------|-------------------------------|------------------|
|                        | Representati-<br>veness of the<br>exposed<br>cohort | Selection of<br>the non-exposed<br>cohort | Ascertainment<br>of exposure |                                                             | Comparability<br>of cohorts on<br>the basis of the<br>design or analy-<br>sis |                          | Adequate<br>follow-up<br>duration | Adequate<br>follow-up<br>rate |                  |
| Oral et al., 2006      | ★                                                   | ★                                         | ★                            | ★                                                           | ★★                                                                            | ★                        | ★                                 | ★                             | 9                |
| Nademanee et al., 2008 | ★                                                   | ★                                         | ★                            | ★                                                           | ★★                                                                            | ★                        | ★                                 | ★                             | 9                |
| Hussein et al., 2011   | ★                                                   | ★                                         | ★                            | ★                                                           | ★★                                                                            | ★                        | ★                                 | ★                             | 9                |
| Hunter et al., 2011    | ★                                                   | ★                                         | ★                            | ★                                                           | –                                                                             | –                        | ★                                 | –                             | 5                |
| Saad et al., 2011      | ★                                                   | ★                                         | ★                            | ★                                                           | ★                                                                             | ★                        | ★                                 | ★                             | 8                |
| Winkle et al., 2013    | ★                                                   | ★                                         | ★                            | –                                                           | ★                                                                             | ★                        | ★                                 | ★                             | 7                |
| Gaita et al., 2014     | ★                                                   | ★                                         | ★                            | ★                                                           | ★                                                                             | ★                        | ★                                 | ★                             | 8                |
| Hermida et al., 2020   | ★                                                   | ★                                         | ★                            | ★                                                           | ★★                                                                            | ★                        | ★                                 | ★                             | 9                |
| Yang et al., 2020      | ★                                                   | ★                                         | ★                            | ★                                                           | ★★                                                                            | ★                        | ★                                 | ★                             | 9                |
| Yu et al., 2020        | ★                                                   | ★                                         | ★                            | ★                                                           | ★★                                                                            | ★                        | ★                                 | ★                             | 9                |
